# Supplementary material for: Biotype and host relatedness influence the composition of bacterial microbiomes in Schizaphis graminum aphids
Source: Frontiers journal article supplement (doi:10.3389/fmicb.2025.1614492), 2025-07-30
Supplement: Table_1.docx [file Table_1.docx]

Supplemental Table 1 Results of Tukey’s HSD, testing for differences in the observed zero-radius OTUs.

|  | Biotype.Host_Species.diff | lwr | upr | p.adj |
| --- | --- | --- | --- | --- |
| K:A-E:A | 45.45 | -125.39 | 216.29 | 1.00 |
| E:B-E:A | 86.51 | -62.18 | 235.21 | 0.70 |
| K:B-E:A | 235.21 | 86.51 | 383.91 | 0.00 |
| E:R-E:A | 66.26 | -96.63 | 229.14 | 0.95 |
| K:R-E:A | -9.36 | -172.25 | 153.52 | 1.00 |
| E:S-E:A | 23.67 | -117.39 | 164.74 | 1.00 |
| K:S-E:A | 106.91 | -34.15 | 247.98 | 0.32 |
| E:W-E:A | 35.90 | -96.22 | 168.02 | 1.00 |
| K:W-E:A | 42.62 | -89.50 | 174.74 | 0.99 |
| E:B-K:A | 41.06 | -116.30 | 198.43 | 1.00 |
| K:B-K:A | 189.76 | 32.39 | 347.12 | 0.01 |
| E:R-K:A | 20.80 | -150.04 | 191.64 | 1.00 |
| K:R-K:A | -54.82 | -225.66 | 116.02 | 0.99 |
| E:S-K:A | -21.78 | -171.96 | 128.39 | 1.00 |
| K:S-K:A | 61.46 | -88.71 | 211.64 | 0.95 |
| E:W-K:A | -9.55 | -151.35 | 132.26 | 1.00 |
| K:W-K:A | -2.84 | -144.64 | 138.97 | 1.00 |
| K:B-E:B | 148.70 | 15.70 | 281.69 | 0.02 |
| E:R-E:B | -20.26 | -168.96 | 128.44 | 1.00 |
| K:R-E:B | -95.88 | -244.57 | 52.82 | 0.56 |
| E:S-E:B | -62.84 | -187.25 | 61.57 | 0.84 |
| K:S-E:B | 20.40 | -104.01 | 144.81 | 1.00 |
| E:W-E:B | -50.61 | -164.77 | 63.55 | 0.92 |
| K:W-E:B | -43.90 | -158.06 | 70.27 | 0.97 |
| E:R-K:B | -168.96 | -317.65 | -20.26 | 0.01 |
| K:R-K:B | -244.57 | -393.27 | -95.88 | 0.00 |
| E:S-K:B | -211.54 | -335.95 | -87.13 | 0.00 |
| K:S-K:B | -128.30 | -252.70 | -3.89 | 0.04 |
| E:W-K:B | -199.31 | -313.47 | -85.14 | 0.00 |
| K:W-K:B | -192.59 | -306.76 | -78.43 | 0.00 |
| K:R-E:R | -75.62 | -238.51 | 87.27 | 0.90 |
| E:S-E:R | -42.58 | -183.65 | 98.48 | 0.99 |
| K:S-E:R | 40.66 | -100.41 | 181.72 | 1.00 |
| E:W-E:R | -30.35 | -162.47 | 101.77 | 1.00 |
| K:W-E:R | -23.64 | -155.76 | 108.48 | 1.00 |
| E:S-K:R | 33.04 | -108.03 | 174.10 | 1.00 |
| K:S-K:R | 116.28 | -24.79 | 257.34 | 0.21 |
| E:W-K:R | 45.27 | -86.85 | 177.39 | 0.98 |
| K:W-K:R | 51.98 | -80.14 | 184.10 | 0.96 |
| K:S-E:S | 83.24 | -31.94 | 198.42 | 0.39 |
| E:W-E:S | 12.23 | -91.80 | 116.26 | 1.00 |
| K:W-E:S | 18.94 | -85.09 | 122.98 | 1.00 |
| E:W-K:S | -71.01 | -175.04 | 33.02 | 0.47 |
| K:W-K:S | -64.30 | -168.33 | 39.73 | 0.62 |
| K:W-E:W | 6.71 | -84.82 | 98.25 | 1.00 |

Supplemental Table 2. Results of ANOVA, testing for differences in Hill1 diversity among groups.

|  | Df | Sum Sq | Mean Sq | F value | P value | R2 | Sig |
| --- | --- | --- | --- | --- | --- | --- | --- |
| Biotype | 1 | 30.54 | 30.54 | 3.4 | 0.0668 | 0.01 | . |
| Host_Species | 4 | 115.60 | 28.90 | 3.21 | 0.0139 | 0.038 | * |
| Infestation_Time | 3 | 0.98 | 0.33 | 0.04 | 0.991 | 0 |  |
| Biotype:Host_Species | 4 | 86.07 | 21.52 | 2.39 | 0.0519 | 0.028 | . |
| Biotype:Infestation_Time | 3 | 8.46 | 2.82 | 0.31 | 0.816 | 0.003 |  |
| Host_Species:Cultivars | 12 | 163.26 | 13.61 | 1.51 | 0.122 | 0.053 |  |
| Host_Species:Infestation_Time | 8 | 74.89 | 9.36 | 1.04 | 0.407 | 0.024 |  |
| Biotype:Host_Species:Cultivars | 12 | 218.60 | 18.22 | 2.03 | 0.0236 | 0.071 | * |
| Biotype:Host_Species:Infestation_Time | 8 | 135.51 | 16.94 | 1.88 | 0.0643 | 0.044 | . |
| Host_Species:Cultivars:Infestation_Time | 24 | 218.10 | 9.09 | 1.01 | 0.455 | 0.071 |  |
| Biotype:Host_Species:Cultivars:Infestation_Time | 24 | 182.16 | 7.59 | 0.84 | 0.678 | 0.059 |  |
| Residuals | 205 | 1844.10 | 9.00 |  |  |  |  |

Supplemental Table 3. Results of Tukey’s HSD, testing for differences in Shannon diversity.

|  | Biotype.Host_Species.diff | lwr | upr | p.adj |
| --- | --- | --- | --- | --- |
| K:A-E:A | 0.06 | -0.27 | 0.39 | 1.00 |
| E:B-E:A | 0.13 | -0.16 | 0.41 | 0.92 |
| K:B-E:A | 0.36 | 0.07 | 0.64 | 0.00 |
| E:R-E:A | 0.09 | -0.22 | 0.40 | 1.00 |
| K:R-E:A | 0.03 | -0.28 | 0.34 | 1.00 |
| E:S-E:A | 0.05 | -0.22 | 0.32 | 1.00 |
| K:S-E:A | 0.14 | -0.13 | 0.41 | 0.81 |
| E:W-E:A | 0.08 | -0.17 | 0.34 | 0.99 |
| K:W-E:A | 0.08 | -0.17 | 0.33 | 0.99 |
| E:B-K:A | 0.07 | -0.23 | 0.37 | 1.00 |
| K:B-K:A | 0.30 | -0.00 | 0.60 | 0.05 |
| E:R-K:A | 0.03 | -0.30 | 0.36 | 1.00 |
| K:R-K:A | -0.03 | -0.36 | 0.30 | 1.00 |
| E:S-K:A | -0.01 | -0.30 | 0.28 | 1.00 |
| K:S-K:A | 0.08 | -0.21 | 0.37 | 1.00 |
| E:W-K:A | 0.02 | -0.25 | 0.30 | 1.00 |
| K:W-K:A | 0.02 | -0.25 | 0.29 | 1.00 |
| K:B-E:B | 0.23 | -0.02 | 0.49 | 0.11 |
| E:R-E:B | -0.04 | -0.32 | 0.25 | 1.00 |
| K:R-E:B | -0.10 | -0.38 | 0.19 | 0.99 |
| E:S-E:B | -0.08 | -0.31 | 0.16 | 0.99 |
| K:S-E:B | 0.01 | -0.22 | 0.25 | 1.00 |
| E:W-E:B | -0.04 | -0.26 | 0.18 | 1.00 |
| K:W-E:B | -0.05 | -0.27 | 0.17 | 1.00 |
| E:R-K:B | -0.27 | -0.56 | 0.01 | 0.08 |
| K:R-K:B | -0.33 | -0.61 | -0.04 | 0.01 |
| E:S-K:B | -0.31 | -0.55 | -0.07 | 0.00 |
| K:S-K:B | -0.22 | -0.46 | 0.02 | 0.10 |
| E:W-K:B | -0.28 | -0.50 | -0.06 | 0.00 |
| K:W-K:B | -0.28 | -0.50 | -0.06 | 0.00 |
| K:R-E:R | -0.06 | -0.37 | 0.25 | 1.00 |
| E:S-E:R | -0.04 | -0.31 | 0.23 | 1.00 |
| K:S-E:R | 0.05 | -0.22 | 0.32 | 1.00 |
| E:W-E:R | -0.00 | -0.26 | 0.25 | 1.00 |
| K:W-E:R | -0.01 | -0.26 | 0.24 | 1.00 |
| E:S-K:R | 0.02 | -0.25 | 0.29 | 1.00 |
| K:S-K:R | 0.11 | -0.16 | 0.38 | 0.95 |
| E:W-K:R | 0.05 | -0.20 | 0.31 | 1.00 |
| K:W-K:R | 0.05 | -0.21 | 0.30 | 1.00 |
| K:S-E:S | 0.09 | -0.13 | 0.31 | 0.95 |
| E:W-E:S | 0.03 | -0.17 | 0.23 | 1.00 |
| K:W-E:S | 0.03 | -0.17 | 0.23 | 1.00 |
| E:W-K:S | -0.06 | -0.26 | 0.14 | 1.00 |
| K:W-K:S | -0.06 | -0.26 | 0.14 | 0.99 |
| K:W-E:W | -0.01 | -0.18 | 0.17 | 1.00 |

Supplemental Table 4. Results of Tukey’s HSD test, testing for differences in the Shannon diversity.

| Species Pair | Host_Species.diff | lwr | upr | p.adj |
| --- | --- | --- | --- | --- |
| B-A | 0.21 | 0.04 | 0.39 | 0.01 |
| R-A | 0.03 | -0.16 | 0.22 | 0.99 |
| S-A | 0.07 | -0.10 | 0.24 | 0.82 |
| W-A | 0.05 | -0.11 | 0.21 | 0.90 |
| R-B | -0.18 | -0.36 | -0.01 | 0.03 |
| S-B | -0.15 | -0.29 | -0.00 | 0.05 |
| W-B | -0.16 | -0.30 | -0.03 | 0.01 |
| S-R | 0.04 | -0.13 | 0.20 | 0.97 |
| W-R | 0.02 | -0.13 | 0.18 | 1.00 |
| W-S | -0.02 | -0.14 | 0.11 | 1.00 |

Supplemental Table 5. Results of Tukey’s HSD, testing for differences in the Shannon diversity over time.

| Days | Infestation_Time.diff | lwr | upr | p.adj |
| --- | --- | --- | --- | --- |
| 2-0 | 0.02 | -0.30 | 0.34 | 1.00 |
| 4-0 | 0.04 | -0.28 | 0.35 | 0.99 |
| 8-0 | -0.03 | -0.34 | 0.29 | 1.00 |
| 4-2 | 0.02 | -0.09 | 0.13 | 0.97 |
| 8-2 | -0.04 | -0.15 | 0.06 | 0.72 |
| 8-4 | -0.06 | -0.17 | 0.05 | 0.44 |

Supplemental Table 6. Results of ANOVA, testing for differences in Hill1 diversity among groups.

|  | Df | Sum Sq | Mean Sq | F value | P value | R2 | Sig |
| --- | --- | --- | --- | --- | --- | --- | --- |
| Biotype | 1 | 30.54 | 30.54 | 3.4 | 0.0668 | 0.01 | . |
| Host_Species | 4 | 115.60 | 28.90 | 3.21 | 0.0139 | 0.038 | * |
| Infestation_Time | 3 | 0.98 | 0.33 | 0.04 | 0.991 | 0 |  |
| Biotype:Host_Species | 4 | 86.07 | 21.52 | 2.39 | 0.0519 | 0.028 | . |
| Biotype:Infestation_Time | 3 | 8.46 | 2.82 | 0.31 | 0.816 | 0.003 |  |
| Host_Species:Cultivars | 12 | 163.26 | 13.61 | 1.51 | 0.122 | 0.053 |  |
| Host_Species:Infestation_Time | 8 | 74.89 | 9.36 | 1.04 | 0.407 | 0.024 |  |
| Biotype:Host_Species:Cultivars | 12 | 218.60 | 18.22 | 2.03 | 0.0236 | 0.071 | * |
| Biotype:Host_Species:Infestation_Time | 8 | 135.51 | 16.94 | 1.88 | 0.0643 | 0.044 | . |
| Host_Species:Cultivars:Infestation_Time | 24 | 218.10 | 9.09 | 1.01 | 0.455 | 0.071 |  |
| Biotype:Host_Species:Cultivars:Infestation_Time | 24 | 182.16 | 7.59 | 0.84 | 0.678 | 0.059 |  |
| Residuals | 205 | 1844.10 | 9.00 |  |  |  |  |

Supplemental Table 7. Results of Tukey’s HSD, testing for differences in Hill1 Diversity.

| Species Pair | Host_Species.diff | lwr | upr | p.adj |
| --- | --- | --- | --- | --- |
| B-A | 1.84 | 0.01 | 3.66 | 0.05 |
| R-A | 0.10 | -1.89 | 2.09 | 1.00 |
| S-A | 0.48 | -1.26 | 2.21 | 0.94 |
| W-A | 0.28 | -1.35 | 1.91 | 0.99 |
| R-B | -1.74 | -3.51 | 0.04 | 0.06 |
| S-B | -1.36 | -2.85 | 0.13 | 0.09 |
| W-B | -1.56 | -2.92 | -0.20 | 0.02 |
| S-R | 0.37 | -1.31 | 2.06 | 0.97 |
| W-R | 0.17 | -1.40 | 1.75 | 1.00 |
| W-S | -0.20 | -1.44 | 1.04 | 0.99 |
